# Supplementary material for: A controlled solvothermal synthesis of CuS hierarchical structures and their natural-light-induced photocatalytic properties
Source: Royal Society of Chemistry journal article supplement (doi:10.1039/c4nj02298j), 2015-01-01
Supplement: c4nj02298j1.pdf [file c4nj02298j1.pdf]

## Electronic Supplementary Information

### Controlled Solvothermal Synthesis of CuS Hierarchical Structures and Their Natural-Light-Induced Photocatalytic Properties

Zahra Hosseinpour<sup>a,b\*</sup>, Abdolali Alemi<sup>a</sup>, Ali Akbar Khandar<sup>a</sup>, Xiujuan Zhao<sup>c</sup>, Yi Xie<sup>b,c\*</sup>

<sup>a</sup> Department of Inorganic Chemistry, Faculty of Chemistry, University of Tabriz, bolvar 29 bahman, Tabriz, Iran. Tel: +98-413-3393130, Fax: +98-413-3340191, E-mail: [Z.Hosseinpour@tabrizu.ac.ir](mailto:Z.Hosseinpour@tabrizu.ac.ir) (Zahra Hosseinpour).

<sup>b</sup> Department of Nanochemistry, Istituto Italiano di Tecnologia (IIT), via Morego, 30, 16163 Genova, Italy. Tel: +39-3778367185, E-mail: [Yi.Xie@iit.it](mailto:Yi.Xie@iit.it), [xieyithanks@163.com](mailto:xieyithanks@163.com) (Yi Xie).

<sup>c</sup> State Key Laboratory of Silicate Materials for Architectures, Wuhan University of Technology, Wuhan 430070, Hubei Province, People's Republic of China

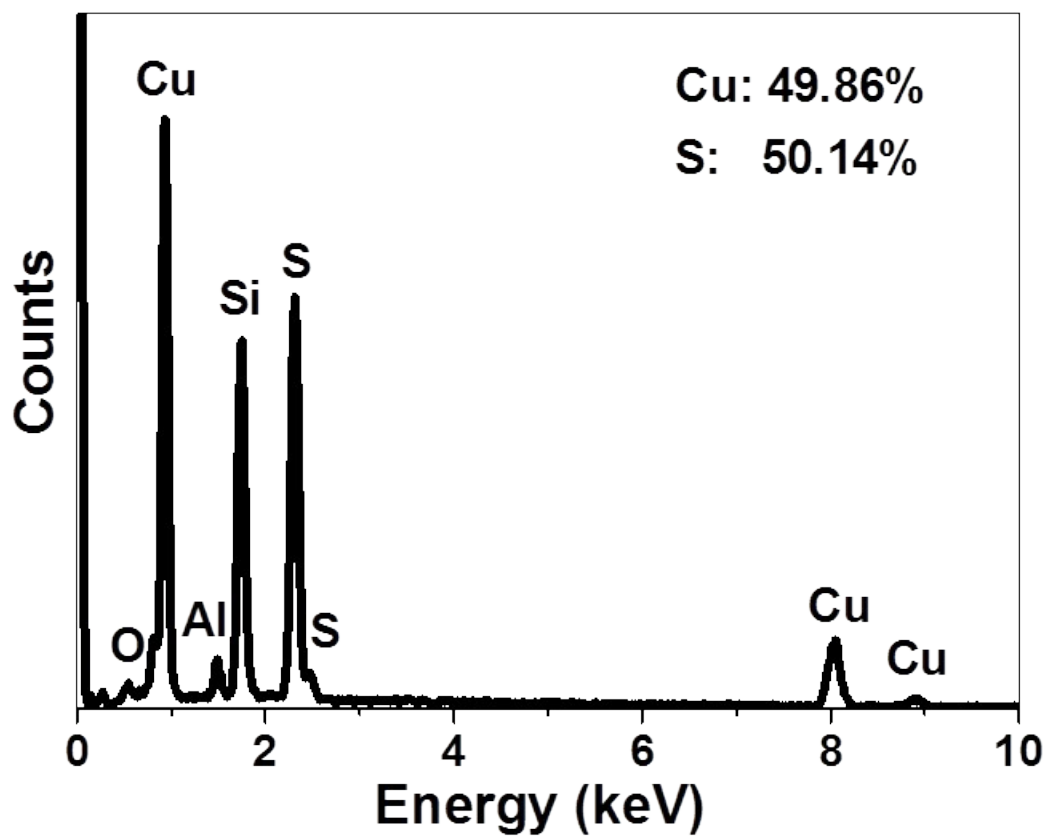

**Figure S1.** FESEM/EDS spectrum of the CuS microflowers obtained with 1:1 EG:ET solvent volume ratio.

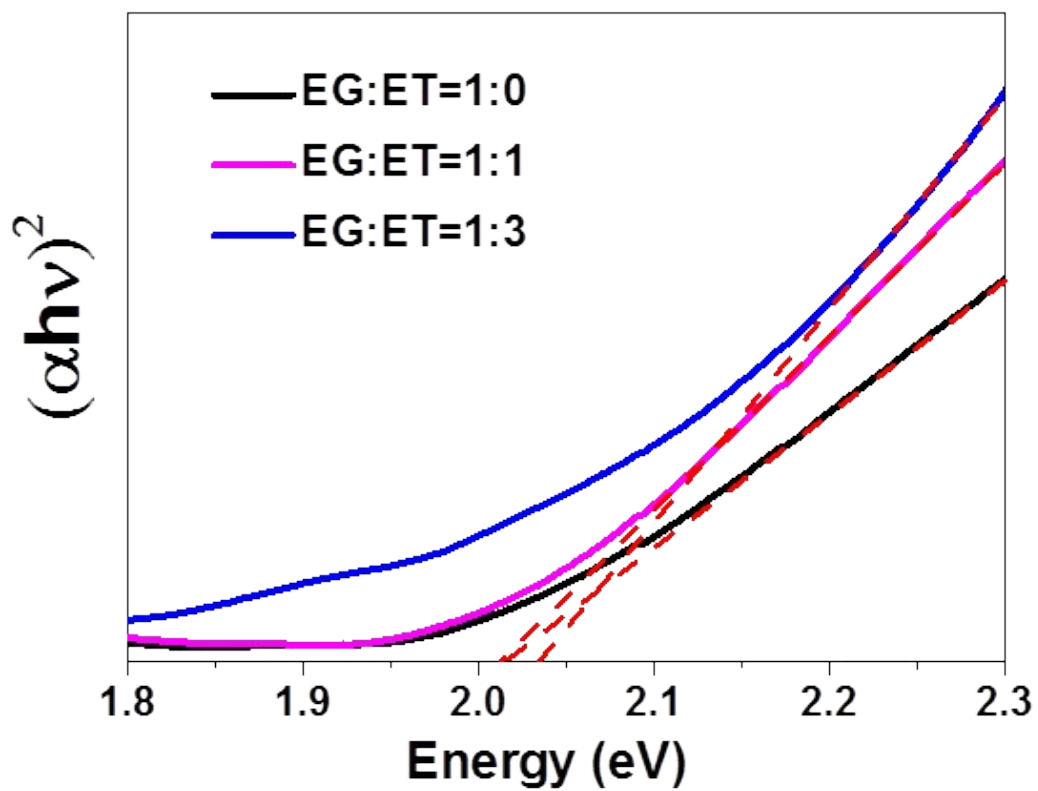

**Figure S2.** Plots of  $(\alpha h\nu)^2$  versus energy with an extrapolation of the optical spectra (dashed red lines) to determine the optical band gap values.

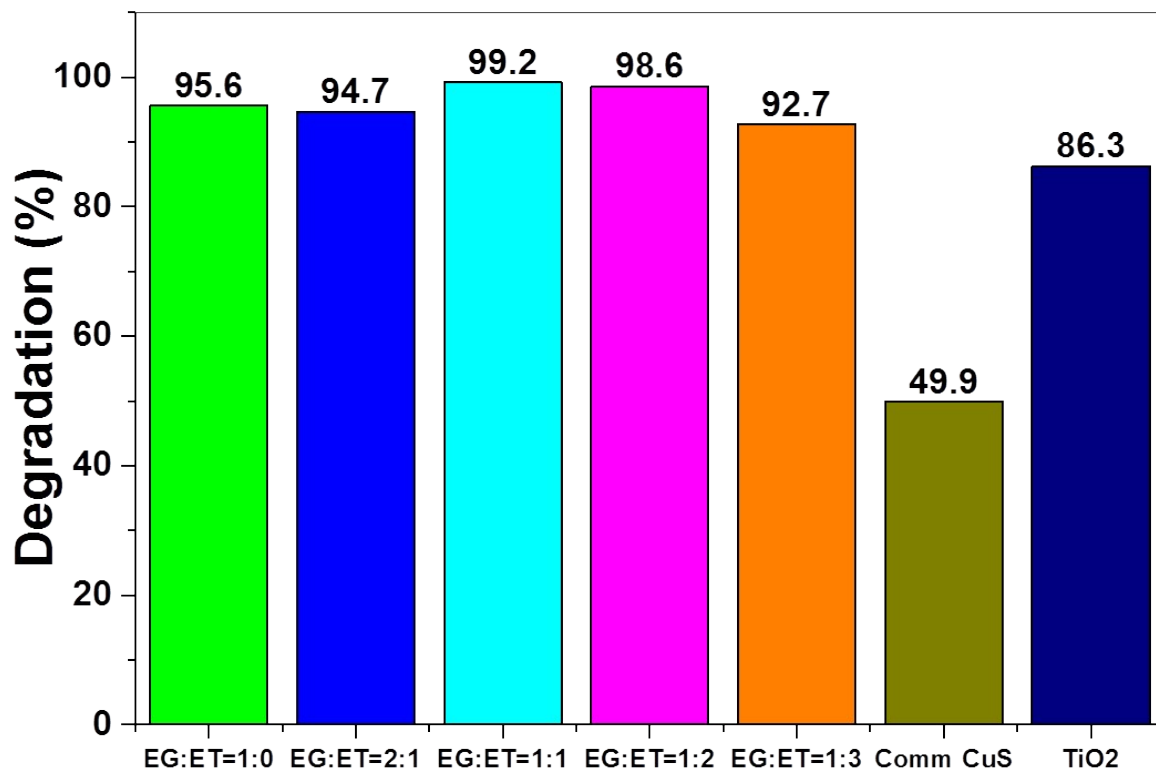

**Figure S3.** The MB degradation percentage on the various CuS photocatalysts achieved with different EG:ET ratios, the commercial CuS (comm CuS) and TiO<sub>2</sub> powders.

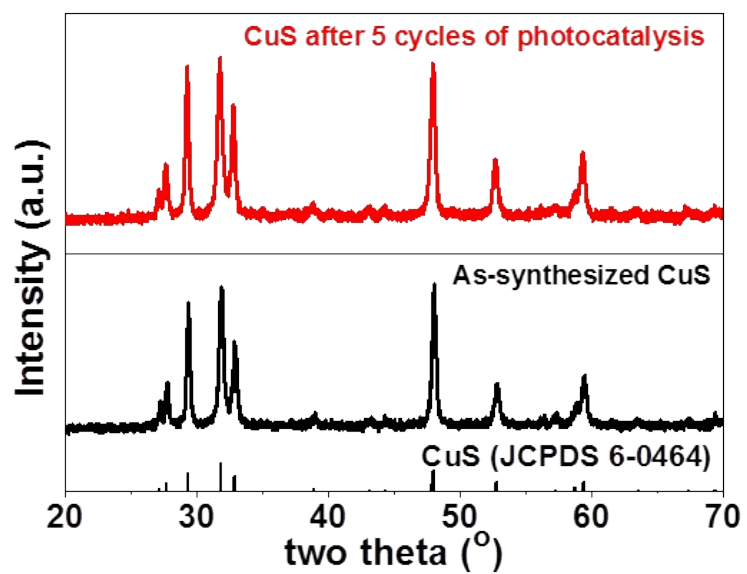

**Figure 4.** XRD patterns of the as-synthesized CuS hierarchical structures with 1:1 EG:ET and the same sample recovered after 5 cycles of photocatalysis.

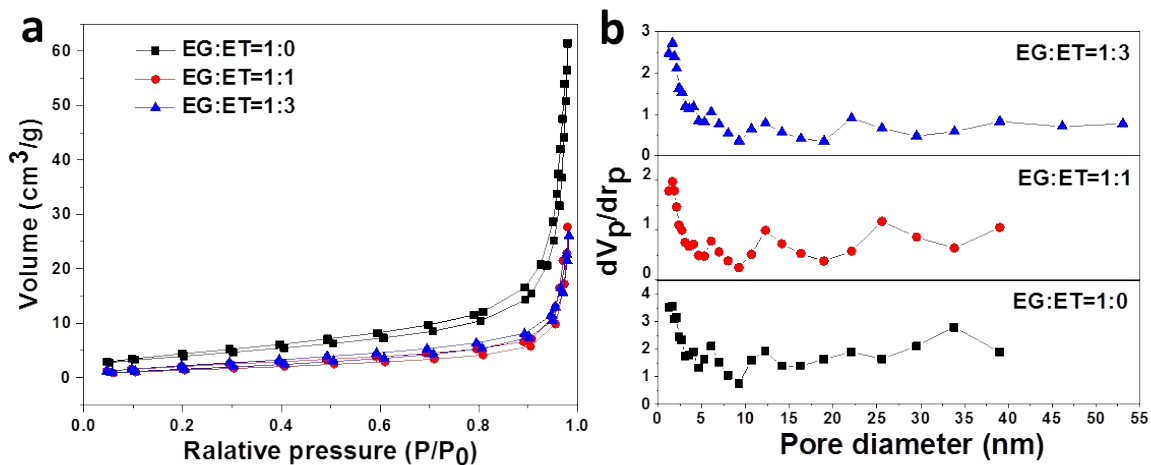

**Figure S5.** (a) Typical N<sub>2</sub> adsorption-desorption isotherms, and (b) BJH pore size distribution plots of CuS hierarchical structures collected with different EG:ET solvent volume ratios.

**Table S1.** Summary of the  $S_{\text{BET}}$ , the pore volumes ( $V_p$ ) and the pore sizes ( $D_p$ ) of the representative CuShierarchical structures obtained with different solvent ratios.

| Photocatalyst | $S_{\text{BET}}(\text{m}^2\text{g}^{-1})$ | $V_p (\text{cm}^3\text{g}^{-1})$ | $D_p (\text{nm})$ | Crystallite size (nm) |
|---------------|-------------------------------------------|----------------------------------|-------------------|-----------------------|
| EG:ET= 1:0    | 14.77                                     | 0.095                            | 25.70             | 21.7                  |
| EG:ET= 1:1    | 5.72                                      | 0.042                            | 29.92             | 30.5                  |
| EG:ET= 1:3    | 6.79                                      | 0.040                            | 23.74             | 31.4                  |
